# Supplementary material for: In Vitro Evaluation of Aerosol Therapy with Pentamidine-Loaded Liposomes Coated with Chondroitin Sulfate or Heparin for the Treatment of Leishmaniasis
Source: MDPI journal article supplement (doi:10.3390/pharmaceutics15041163), 2023-04-06
Supplement: s1 [file s1]

# Supplementary Materials

## *In Vitro* Evaluation of Aerosol Therapy with Pentamidine-loaded Liposomes Coated with Chondroitin Sulfate or Heparin for the Treatment of Leishmaniasis

Lucía Román-Álamo, Mohamad Allaw, Yunuen Avalos-Padilla, Maria Letizia Manca, Maria Manconi, Federica Fulgheri, Jorge Fernández-Lajo, Luis Rivas, José Antonio Vázquez, José Esteban Peris, Xavier Roca-Geronès, Srisupaph Poonlaphdecha, Maria Magdalena Alcover, Roser Fisa, Cristina Riera, and Xavier Fernàndez-Busquets

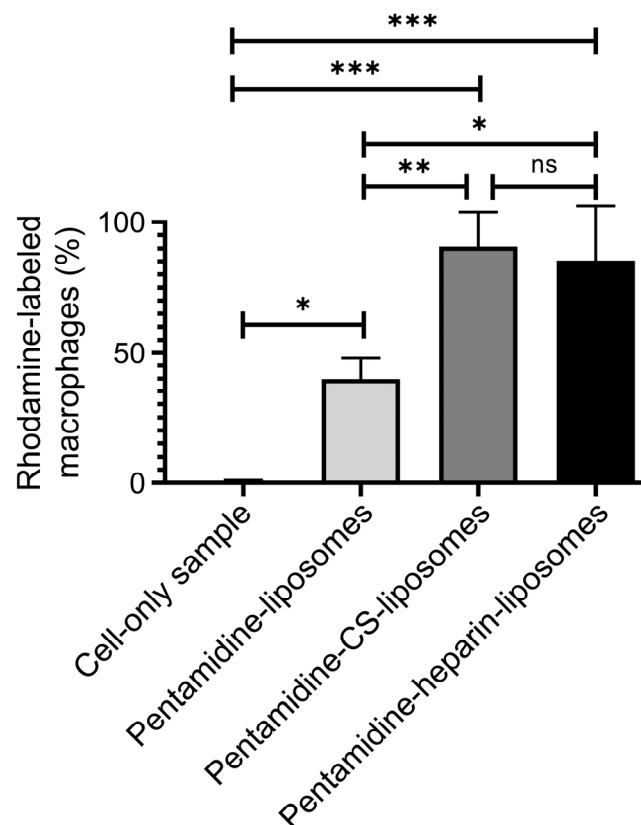

**Supplementary Figure S1.** One-way analysis of variance to determine statistically significant differences between the different samples of the flow cytometry data in Figure 5. \*:  $p \leq 0.05$ ; \*\*:  $p \leq 0.01$ ; \*\*\*:  $p \leq 0.001$  (relative to the control cell-only sample).

**Supplementary Table S1.** Comparison of the  $IC_{50}$  of pentamidine in *L. infantum* amastigotes calculated with the microscopy and fluorescence methods.

|                               | Pentamidine $IC_{50}$ in <i>L. infantum</i> amastigotes ( $\mu M$ ) |                     |
|-------------------------------|---------------------------------------------------------------------|---------------------|
|                               | Microscopy method                                                   | Fluorescence method |
| Pentamidine solution          | $5.6 \pm 1.4$                                                       | $3.5 \pm 0.9$       |
| Pentamidine-liposomes         | $4.7 \pm 2.9$                                                       | $2.6 \pm 0.4$       |
| Pentamidine-CS-liposomes      | $3.1 \pm 0.6$                                                       | $2.5 \pm 0.4$       |
| Pentamidine-heparin-liposomes | $4.1 \pm 0.7$                                                       | $3.3 \pm 0.8$       |
